# Supplementary material for: From dinuclear to two-dimensional Dy(iii) complexes: single crystal–single crystal transformation and single-molecule magnetic behavior
Source: Royal Society of Chemistry journal article supplement (doi:10.1039/d2tc04452h), 2022-12-20
Supplement: d2tc04452h1.pdf [file d2tc04452h1.pdf]

# Electronic supplementary information

## From dinuclear to two-dimensional Dy(III) complexes: Single crystal-single crystal transformation and single-molecule magnetic behavior

Yi-Shu Jin,<sup>a</sup> Ke Yu,<sup>a</sup> Nan Zhang,<sup>a</sup> Yi-Quan Zhang,<sup>\*b</sup> Cai-Ming Liu<sup>c</sup> and Hui-Zhong  
Kou<sup>\*a</sup>

---

<sup>a</sup> Department of Chemistry, Tsinghua University, Beijing 100084, P. R. China.

Email: kouhz@mail.tsinghua.edu.cn

<sup>b</sup> Jiangsu Key Lab for NSLSCS, School of Physical Science and Technology.

Nanjing Normal University, Nanjing 210023, P. R. China. Email:

zhangyiquan@njnu.edu.cn

<sup>c</sup> Beijing National Laboratory for Molecular Sciences, Center for Molecular  
Science, Institute of Chemistry, Chinese Academy of Sciences, Beijing 100190,  
P. R. China.

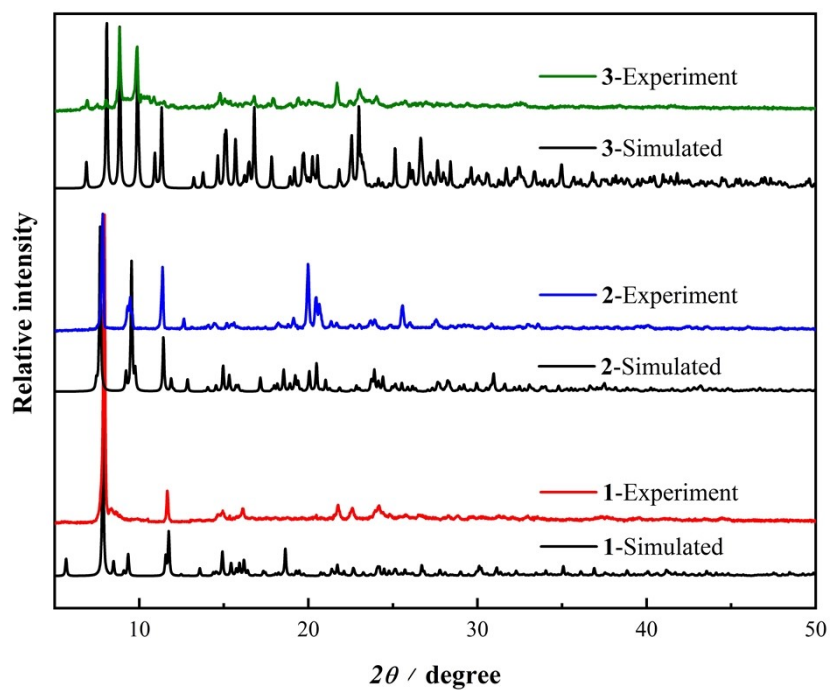

**Fig. S1.** Powder diffraction spectra of complexes 1-3.

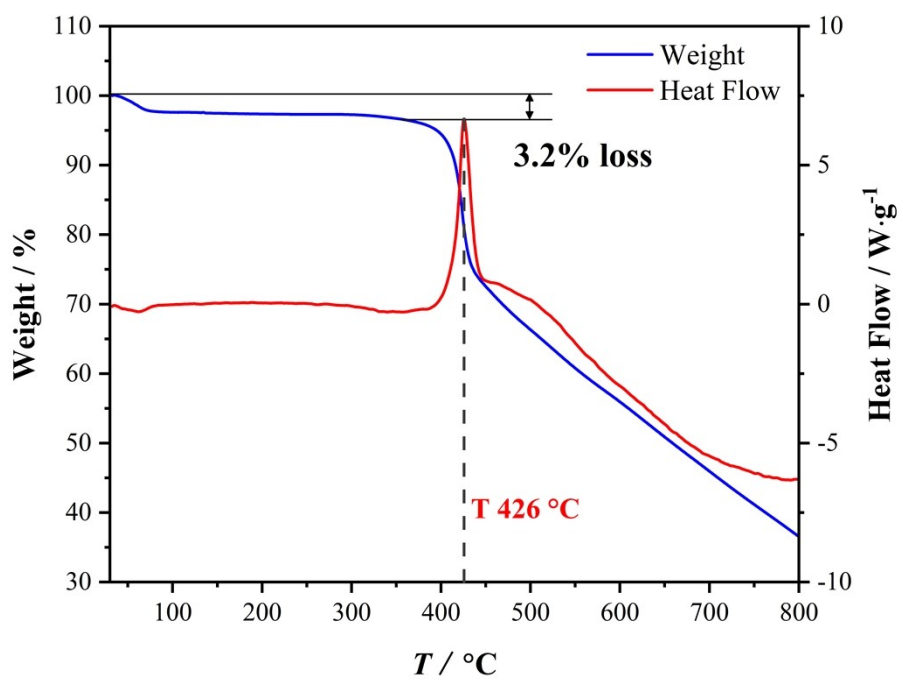

**Fig. S2.** Thermogravimetric and differential thermal analysis (TGA-DSC) curves of 1.

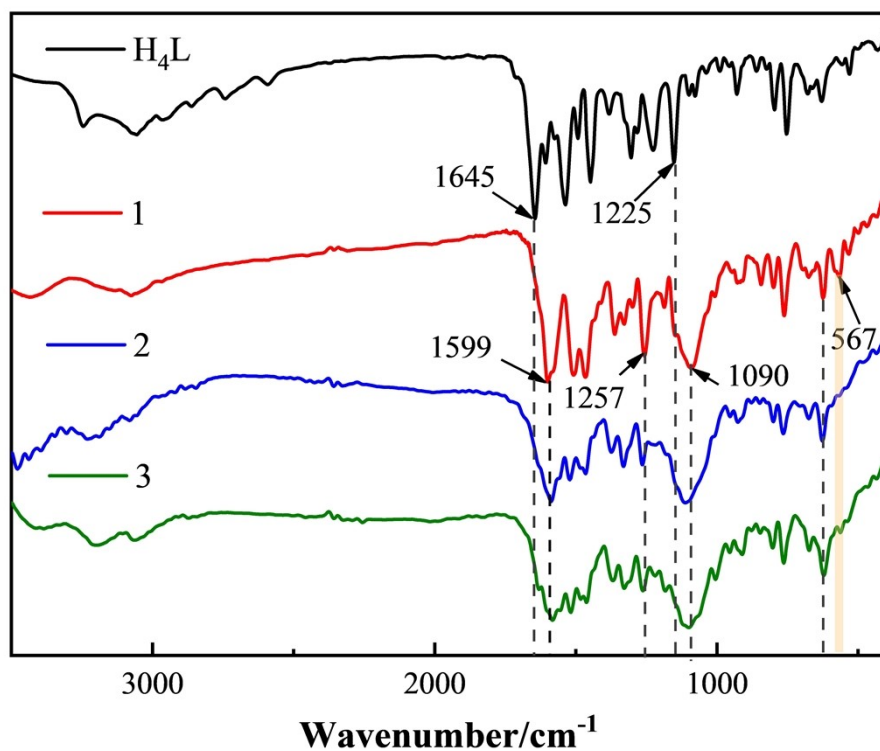

**Fig. S3.** IR spectra of H<sub>4</sub>L and 1-3.

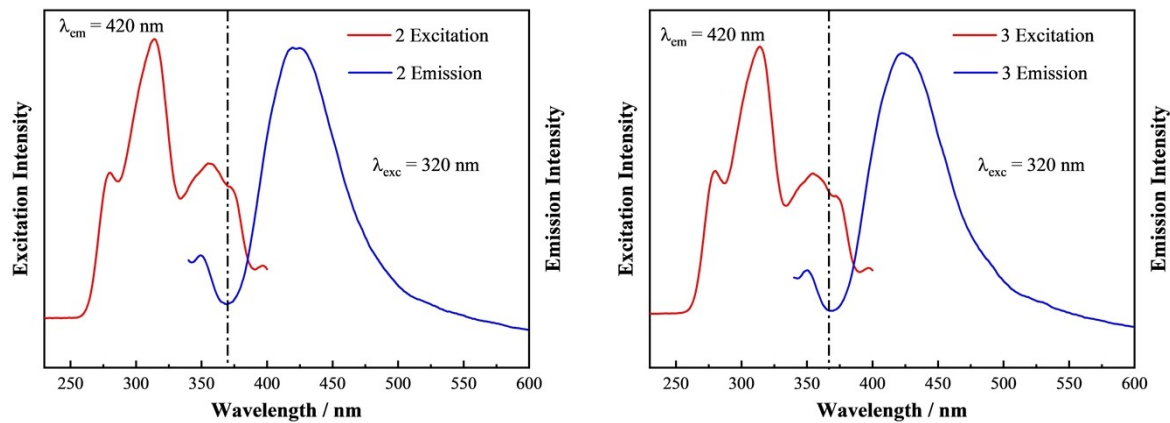

**Fig. S4.** Excitation and emission spectra of 2 (left) and 3 (right) in DMF solution ( $1 \times 10^{-5}$  M).

**Table S1.** Crystal data and structure refinement for **1-4**.

| Compound reference                     | 1                                                                                               | 2                                                                                               | 3                                                                                               | 4                                                                                               |
|----------------------------------------|-------------------------------------------------------------------------------------------------|-------------------------------------------------------------------------------------------------|-------------------------------------------------------------------------------------------------|-------------------------------------------------------------------------------------------------|
| Chemical formula                       | C <sub>53</sub> H <sub>44</sub> Cl <sub>2</sub> Dy <sub>2</sub> N <sub>12</sub> O <sub>19</sub> | C <sub>58</sub> H <sub>56</sub> Cl <sub>4</sub> Dy <sub>2</sub> N <sub>14</sub> O <sub>28</sub> | C <sub>60</sub> H <sub>58</sub> Cl <sub>4</sub> Dy <sub>2</sub> N <sub>16</sub> O <sub>28</sub> | C <sub>60</sub> H <sub>58</sub> Cl <sub>4</sub> Dy <sub>2</sub> N <sub>16</sub> O <sub>28</sub> |
| Formula weight                         | 1548.90                                                                                         | 1863.96                                                                                         | 1918.02                                                                                         | 1918.02                                                                                         |
| Temperature / K                        | 173.00(10)                                                                                      | 173.15                                                                                          | 100.00(10)                                                                                      | 173.00(10)                                                                                      |
| Crystal system                         | orthorhombic                                                                                    | monoclinic                                                                                      | triclinic                                                                                       | triclinic                                                                                       |
| Space group                            | <i>P</i> 2 <sub>1</sub> 2 <sub>1</sub> 2 <sub>1</sub>                                           | <i>P</i> 2 <sub>1</sub> / <i>n</i>                                                              | <i>P</i> -1                                                                                     | <i>P</i> -1                                                                                     |
| <i>a</i> /Å                            | 11.9057(5)                                                                                      | 12.9807(5)                                                                                      | 11.8821(3)                                                                                      | 12.5478(4)                                                                                      |
| <i>b</i> /Å                            | 21.5577(9)                                                                                      | 14.8796(7)                                                                                      | 12.2416(3)                                                                                      | 13.1202(3)                                                                                      |
| <i>c</i> /Å                            | 22.5132(13)                                                                                     | 18.7475(9)                                                                                      | 12.9637(3)                                                                                      | 13.2302(4)                                                                                      |
| $\alpha$ /°                            | 90                                                                                              | 90                                                                                              | 93.377(2)                                                                                       | 112.328(3)                                                                                      |
| $\beta$ /°                             | 90                                                                                              | 104.903(4)                                                                                      | 95.040(2)                                                                                       | 111.002(3)                                                                                      |
| $\gamma$ /°                            | 90                                                                                              | 90                                                                                              | 111.951(2)                                                                                      | 97.998(2)                                                                                       |
| Volume/Å <sup>3</sup>                  | 5778.2(5)                                                                                       | 3499.2(3)                                                                                       | 1733.57(8)                                                                                      | 1782.79(10)                                                                                     |
| Z                                      | 4                                                                                               | 2                                                                                               | 1                                                                                               | 1                                                                                               |
| $\rho_{\text{calc}}$ g/cm <sup>3</sup> | 1.780                                                                                           | 1.769                                                                                           | 1.837                                                                                           | 1.786                                                                                           |
| R <sub>int</sub>                       | 0.0366                                                                                          | 0.0491                                                                                          | 0.0301                                                                                          | 0.0378                                                                                          |
| GOF on <i>F</i> <sup>2</sup>           | 1.058                                                                                           | 1.106                                                                                           | 1.041                                                                                           | 1.052                                                                                           |
| <i>R</i> <sub>1</sub>                  | 0.0633                                                                                          | 0.0911                                                                                          | 0.0425                                                                                          | 0.0391                                                                                          |
| w <i>R</i> <sub>2</sub>                | 0.1591                                                                                          | 0.2232                                                                                          | 0.1010                                                                                          | 0.0799                                                                                          |
| CCDC                                   | 2195447                                                                                         | 2210188                                                                                         | 2210189                                                                                         | 2210190                                                                                         |

**Table S2.** Selected bond distances (Å) and angles (°) for **1**.

| Dy1      |           |            |          | Dy2      |           |            |          |
|----------|-----------|------------|----------|----------|-----------|------------|----------|
| Distance |           | Angel      |          | Distance |           | Angel      |          |
| Dy1-O3   | 2.252(10) | O3-Dy1-O4  | 154.6(4) | Dy2-O1   | 2.435(9)  | O7-Dy2-O8  | 152.0(4) |
| Dy1-O4   | 2.213(10) | O5-Dy1-O9  | 136.2(4) | Dy2-O2   | 2.429(8)  | O8-Dy2-O1W | 66.3(4)  |
| Dy1-O5   | 2.469(11) | O3-Dy1-O5  | 73.3(4)  | Dy2-O7   | 2.261(10) | O1-Dy2-O2  | 64.8(3)  |
| Dy1-O6   | 2.409(10) | N7-Dy1-N10 | 120.0(4) | Dy2-O8   | 2.22(1)   | N1-Dy2-N3  | 61.7(4)  |
| Dy1-O9   | 2.626(12) | N8-Dy1-N10 | 61.4(4)  | Dy2-O1W  | 2.558(10) | N2-Dy2-N3  | 119.6(4) |
| Dy1-N7   | 2.590(13) | N7-Dy1-N8  | 62.4(4)  | Dy2-N1   | 2.609(13) | N1-Dy2-N2  | 61.1(4)  |
| Dy1-N8   | 2.552(12) |            |          | Dy2-N2   | 2.628(12) |            |          |
| Dy1-N9   | 2.531(11) |            |          | Dy2-N3   | 2.584(10) |            |          |
| Dy1-N10  | 2.577(10) |            |          | Dy2-N4   | 2.581(9)  |            |          |

**Table S3.** Selected bond distances (Å) and angels (°) for **2-4**.

| <b>2</b>                  |                 | <b>3</b>     |                 | <b>4</b>     |                 |
|---------------------------|-----------------|--------------|-----------------|--------------|-----------------|
| <b>Distance and Angel</b> |                 |              |                 |              |                 |
| Dy-O1                     | 2.427(8)        | Dy-O1        | 2.429(3)        | Dy-O1        | 2.407(2)        |
| Dy-O2                     | 2.483(7)        | Dy-O2        | 2.465(3)        | Dy-O2        | 2.473(3)        |
| <b>Dy-O3</b>              | <b>2.175(8)</b> | <b>Dy-O3</b> | <b>2.190(3)</b> | <b>Dy-O3</b> | <b>2.215(3)</b> |
| Dy-O5                     | 2.381(13)       | Dy-O5        | 2.408(4)        | Dy-O5        | 2.405(3)        |
| Dy-N1                     | 2.605(8)        | Dy-N1        | 2.618(4)        | Dy-O6        | 2.391(3)        |
| Dy-N2                     | 2.600(9)        | Dy-N2        | 2.584(4)        | Dy-N1        | 2.577(3)        |
| Dy-N3                     | 2.545(8)        | Dy-N3        | 2.544(4)        | Dy-N2        | 2.564(3)        |
| Dy-N4                     | 2.572(8)        | Dy-N4        | 2.584(4)        | Dy-N3        | 2.535(3)        |
| Dy-N7                     | 2.458(10)       | Dy-N7        | 2.444(4)        | Dy-N4        | 2.600(3)        |
| O3-Dy-O5                  | 146.1(4)        | O3-Dy-O5     | 145.59(15)      | O3-Dy-O5     | 143.54(10)      |
| N3-Dy-N4                  | 159.2(3)        | O3-Dy-N7     | 143.51(14)      | O3-Dy-O6     | 147.61(11)      |
| N1-Dy-O2                  | 154.2(3)        | N1-Dy-O2     | 153.38(11)      | N1-Dy-O2     | 150.62(10)      |
| N2-Dy-O1                  | 166.4(3)        | N2-Dy-O1     | 162.52(12)      | N2-Dy-O1     | 162.97(10)      |
| N7-Dy-O3                  | 143.9(3)        | N7-Dy-O3     | 143.51(14)      | N3-Dy-N4     | 160.61(11)      |

**Table S4.** The coordination geometry calculated by SHAPE 2.1 for **1-3**.

| Configuration                            | 1            |              | 2            | 3            |
|------------------------------------------|--------------|--------------|--------------|--------------|
|                                          | Dy1          | Dy2          | Dy           | Dy           |
| Enneagon (D9h)                           | 33.447       | 32.744       | 29.942       | 31.293       |
| Octagonal pyramid (C8v)                  | 22.459       | 22.558       | 21.551       | 21.136       |
| Heptagonal bipyramid (D7h)               | 13.409       | 13.839       | 14.692       | 15.046       |
| Johnson triangular cupola J3 (C3v)       | 13.673       | 13.984       | 15.336       | 14.278       |
| Capped cube J8 (C4v)                     | 7.485        | 6.440        | 6.180        | 6.326        |
| Spherical-relaxed capped cube (C4v)      | 6.622        | 5.597        | 5.048        | 5.259        |
| Capped square antiprism J10 (C4v)        | 5.616        | 6.268        | 6.439        | 5.918        |
| Spherical capped square antiprism (C4v)  | 4.794        | 5.454        | 5.304        | 4.772        |
| Tricapped trigonal prism J51 (D3h)       | 5.716        | 6.015        | 5.306        | 5.204        |
| Spherical tricapped trigonal prism (D3h) | 5.480        | 6.058        | 5.939        | 5.589        |
| Tridiminished icosahedron J63 (C3v)      | 9.416        | 9.276        | 11.519       | 12.416       |
| <b>Hula-hoop (C<sub>2v</sub>)</b>        | <b>3.937</b> | <b>3.264</b> | <b>3.597</b> | <b>3.879</b> |
| Muffin (Cs)                              | 4.156        | 4.664        | 4.284        | 3.793        |

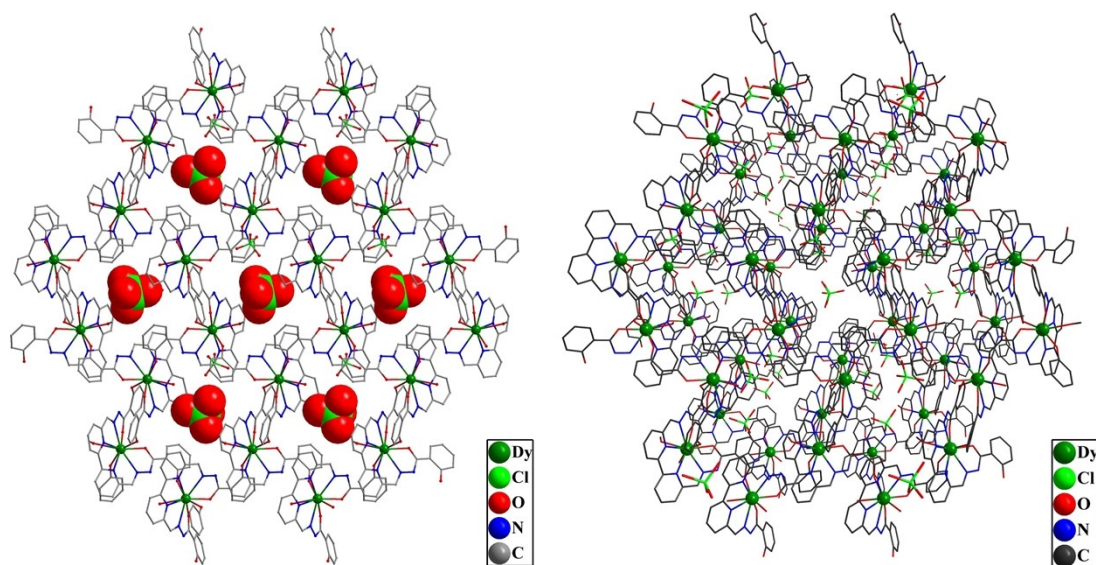

**Fig. S5.** The periodic nanoscale porosity of **1** filled with perchlorate anion (left); Schematic view of the 2D network of **1** along *c* axis.

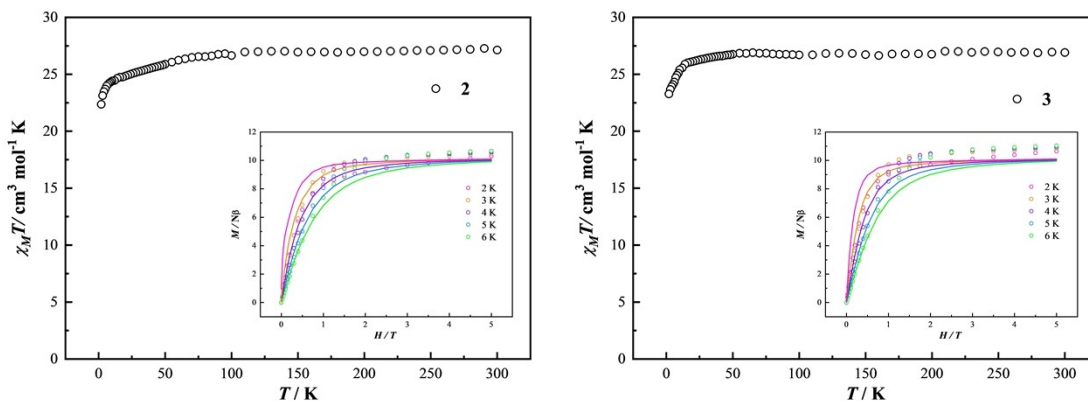

**Fig. S6.** Temperature dependence of  $\chi_M T$  for **2** (left) and **3** (right). Inset: Experimental (circle dots) and calculated data (solid lines) of  $M$  vs  $H$  for **2** and **3**.

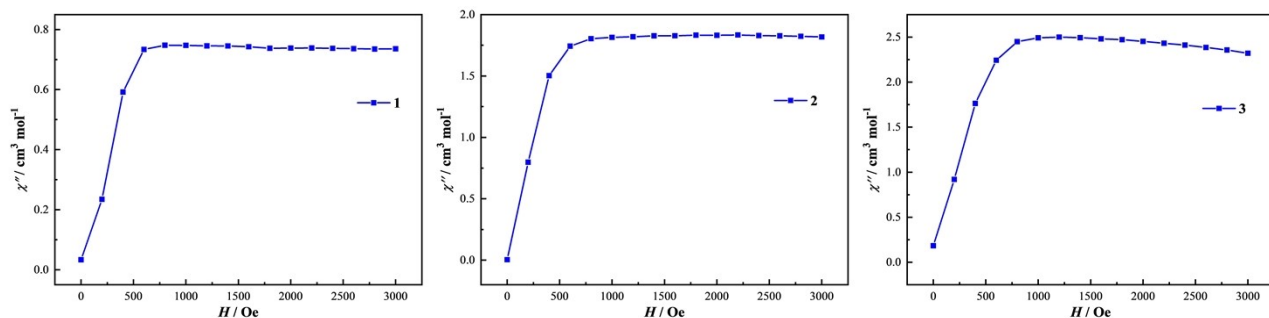

**Fig. S7.** Field-dependence of out-of-phase signals for **1-3** on varied dc fields at 10 K and 997Hz.

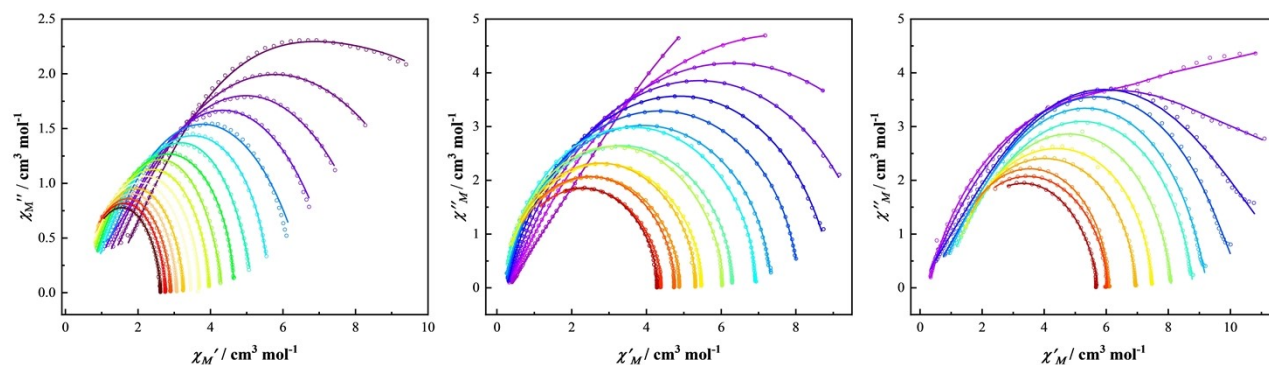

**Fig. S8.** Cole-Cole circle plots for **1** and **2** from 2.0 to 10.0 K, **3** from 2.0 to 8.0 K. The lines correspond to the best fitting according to the modified Debye functions.

**Table S5.** Linear combination of two modified Debye model fitting parameters from 2.0 K to 10 K under 800 Oe dc field for **1**.

| $T$ (K) | $\tau_1$ (s) | $\alpha_1$ | $\tau_2$ (s) | $\alpha_2$ | $\chi_0$ (cm $\cdot$ mol $^{-1}$ ) | $\chi_1$ (cm $\cdot$ mol $^{-1}$ ) | $\chi_2$ (cm $\cdot$ mol $^{-1}$ ) |
|---------|--------------|------------|--------------|------------|------------------------------------|------------------------------------|------------------------------------|
| 2.0     | 0.10725      | 0.04229    | 0.00997      | 0.24499    | 1.10709                            | 13.1478                            | 14.94503                           |
| 2.5     | 0.02158      | 0.51667    | 0.0007623    | 0.20689    | 0.91719                            | 10.98869                           | 10.74988                           |
| 3.0     | 0.0178       | 0.43568    | 0.0003596    | 0.39967    | 0.86618                            | 8.30736                            | 8.79262                            |
| 3.5     | 0.01288      | 0.38826    | 0.0001789    | 0.08035    | 0.79918                            | 7.16485                            | 7.54844                            |
| 4.0     | 0.00851      | 0.37982    | 0.0001021    | 2.28907    | 0.88923                            | 6.69972                            | 6.48337                            |
| 4.5     | 0.01141      | 0.43686    | 0.08225      | 0.25075    | 0.63451                            | 7.92634                            | 5.93653                            |
| 5.0     | 0.00639      | 0.18629    | 0.0009591    | 0.3578     | 0.61218                            | 3.40055                            | 5.17761                            |
| 5.5     | 0.00399      | 0.36754    | 0.04372      | 0.26753    | 0.5696                             | 5.70754                            | 4.71221                            |
| 6.0     | 0.0027       | 0.1964     | 0.000278     | 0.17467    | 0.59263                            | 3.6633                             | 4.33668                            |
| 6.5     | 0.00243      | 0.354      | 0.00882      | 0.36442    | 0.46263                            | 6.15702                            | 3.97082                            |
| 7.0     | 0.00126      | 0.3102     | 0.02423      | 1.79341    | 0.05564                            | 3.70712                            | 4.11584                            |
| 7.5     | 0.00101      | 0.3166     | 0.00979      | 0.31529    | 0.40852                            | 4.09033                            | 3.46404                            |
| 8.0     | 0.0007624    | 0.30528    | 0.00522      | 0.36535    | 0.399                              | 3.92221                            | 3.24296                            |
| 8.5     | 0.0006413    | 0.318      | 0.00286      | 0.36385    | 0.35188                            | 4.1017                             | 3.06194                            |
| 9.0     | 0.0004377    | 0.29396    | 0.00338      | 0.36051    | 0.35453                            | 3.39349                            | 2.89635                            |
| 9.5     | 0.0003869    | 0.32349    | 0.00171      | 0.37146    | 0.2816                             | 3.73201                            | 2.74923                            |
| 10      | 0.0002653    | 0.27219    | 0.0033       | 0.32701    | 0.36038                            | 2.88797                            | 2.61996                            |

**Table S6.** Linear combination of two modified Debye model fitting parameters from 2.0 K to 10 K under 1000 Oe dc field for **2**.

| $T$ (K) | $\tau_s$ (s) | $\tau_f$ (s) | $\alpha_s$ | $\alpha_f$ | $\beta$ (cm $\cdot$ mol $^{-1}$ ) | $\chi_t$ (cm $\cdot$ mol $^{-1}$ ) | $\chi_s$ (cm $\cdot$ mol $^{-1}$ ) |
|---------|--------------|--------------|------------|------------|-----------------------------------|------------------------------------|------------------------------------|
| 2.0     | 3.44444      | 0.43827      | 0.10296    | 0.42776    | 0.7688                            | 18.3766                            | 0.33603                            |
| 3.0     | 1.1893       | 0.19005      | 0.2429     | 0.60606    | 0.90466                           | 14.93235                           | 0.16913                            |
| 3.5     | 0.45967      | 1.74856      | 0.1743     | 0.62412    | 0.77032                           | 13.0486                            | 0.16913                            |
| 4.0     | 0.22488      | 0.13949      | 0.08243    | 0.32391    | 0.66525                           | 10.21186                           | 0.26448                            |
| 4.5     | 0.13137      | 0.08154      | 1.25304E-4 | 0.19543    | 0.36407                           | 9.03469                            | 0.26726                            |
| 5.0     | 0.06159      | 0.30695      | 0.14727    | 0.0478     | 1.09309                           | 8.16792                            | 0.23352                            |
| 5.5     | 0.03391      | 0.21022      | 0.13343    | 0.05571    | 1.06564                           | 7.38257                            | 0.20136                            |
| 6.0     | 0.01307      | 0.13896      | 0.0929     | 2.08909    | 0.97603                           | 7.12063                            | 2.59313E-15                        |
| 6.5     | 0.01232      | 0.12164      | 0.11585    | 0.07699    | 1.04217                           | 6.31566                            | 0.15558                            |
| 7.0     | 0.00555      | 0.10553      | 0.07669    | 5.9531     | 0.98919                           | 6.10504                            | 0.09502                            |
| 7.5     | 0.00528      | 0.08945      | 0.10758    | 2.08219    | 0.97809                           | 5.60868                            | 6.95932E-16                        |
| 8.0     | 0.00274      | 0.04108      | 0.08426    | 1.97965    | 0.97906                           | 5.42942                            | 9.33083E-15                        |
| 8.5     | 0.00266      | 0.0319       | 0.11426    | 0.1651     | 1.04237                           | 4.88252                            | 0.094                              |
| 9.0     | 0.00149      | 0.0203       | 0.08294    | 1.87299    | 0.97501                           | 4.8651                             | 7.9705E-15                         |
| 9.5     | 0.00144      | 0.02578      | 0.10483    | 1.83682    | 0.97194                           | 4.50827                            | 4.36123E-15                        |
| 10.0    | 8.79197E-4   | 0.00655      | 0.08172    | 1.7999     | 0.96351                           | 4.44759                            | 5.30184E-16                        |



**Table S7.** Linear combination of two modified Debye model fitting parameters from 2.0 K to 8.0 K under 1200 Oe dc field for **3**.

| $T$ (K) | $\tau_s$ (s) | $\tau_f$ (s) | $\alpha_s$ | $\alpha_f$ | $\beta$ (cm·mol <sup>-1</sup> ) | $\chi_t$ (cm·mol <sup>-1</sup> ) | $\chi_s$ (cm·mol <sup>-1</sup> ) |
|---------|--------------|--------------|------------|------------|---------------------------------|----------------------------------|----------------------------------|
| 2.0     | 0.05859      | 3.3457       | 0.02674    | 0.39571    | 0.07781                         | 27.88161                         | 0.29858                          |
| 2.5     | 0.09306      | 1.31682      | 0.24756    | 0.0881     | 0.51479                         | 16.17204                         | 0.24628                          |
| 3.0     | 0.08472      | 6.47225      | 0.2246     | 0.60569    | 0.3569                          | 20.73071                         | 1.02824E-15                      |
| 3.5     | 0.06104      | 0.0773       | 0.00634    | 0.48289    | 0.30602                         | 12.29853                         | 5.85746E-17                      |
| 4.0     | 0.03994      | 0.02225      | 0.02221    | 0.4598     | 0.48405                         | 10.46017                         | 0.21908                          |
| 4.5     | 0.02505      | 0.01035      | 0.00784    | 0.34593    | 0.52637                         | 9.28647                          | 0.52708                          |
| 5.0     | 0.01653      | 0.00503      | 0.03961    | 0.29638    | 0.60095                         | 8.81349                          | 0.72769                          |
| 5.5     | 0.00958      | 0.00243      | 0.06494    | 0.21907    | 0.71815                         | 8.10269                          | 0.84028                          |
| 6.0     | 0.0085       | 0.00317      | 1.96304E-4 | 0.13428    | 0.32601                         | 7.48751                          | 0.9798                           |
| 6.5     | 0.00606      | 0.00217      | 0.00252    | 0.11109    | 0.26245                         | 6.95481                          | 0.98286                          |
| 7.0     | 0.00146      | 0.00342      | 0.07698    | 0.00185    | 0.72026                         | 6.08912                          | 0.93062                          |
| 7.5     | 0.00133      | 0.00907      | 0.19505    | 0.36252    | 1.12131                         | 5.99961                          | 0.67499                          |
| 8.0     | 9.00024E-4   | 0.04668      | 0.1387     | 5.7584     | 0.98759                         | 5.74152                          | 0.83867                          |

## Computational details

Complex **1** has two magnetic center Dy<sup>III</sup> ions indicated as **Dy1** and **Dy2**. For binuclear complexes **2** and **3**, we only need to calculate one individual Dy<sup>III</sup> fragment (**Dy1**) due to the centrosymmetric structure (see Figs. S8 and S0). Complete-active-space self-consistent field (CASSCF) calculations on individual Dy<sup>III</sup> fragments have been carried out with OpenMolcas program package. Each of individual Dy<sup>III</sup> fragments for **1–3** was calculated keeping the experimentally determined structures of the corresponding compounds while replacing the other Dy<sup>III</sup> ions with diamagnetic Lu<sup>III</sup>.

The basis sets for all atoms are atomic natural orbitals from the ANO-RCC library: ANO-RCC-VTZP for Dy<sup>III</sup>; VTZ for close N and O; VDZ for distant atoms. The calculations employed the second order Douglas-Kroll-Hess Hamiltonian, where scalar relativistic contractions were taken into account in the basis set and the spin-orbit couplings were handled separately in the restricted active space state interaction (RASSI-SO) procedure.<sup>S1,S2</sup> For each individual Dy<sup>III</sup> fragment, active electrons in 7 active orbitals include all *f* electrons (CAS(9 in 7 for Dy<sup>III</sup>)) in the CASSCF calculation. To exclude all the doubts, we calculated all the roots in the active space. We have mixed the maximum number of spin-free state which was possible with our hardware (all from 21 sextets, 128 from 224 quadruplets, 130 from 490 doublets) for each fragment. SINGLE\_ANISO program was used to obtain the energy levels, *g* tensors, magnetic axes, *et al.* based on the above CASSCF/RASSI-SO calculations.

## References

- S1 P. Å. Malmqvist, B. O. Roos, B. Schimmelpfennig, *Chem. Phys. Lett.*, **2002**, 357, 230–240.  
S2 B. A. Heß, C. M. Marian, U. Wahlgren, O. Gropen, *Chem. Phys. Lett.*, **1996**, 251, 365–371.

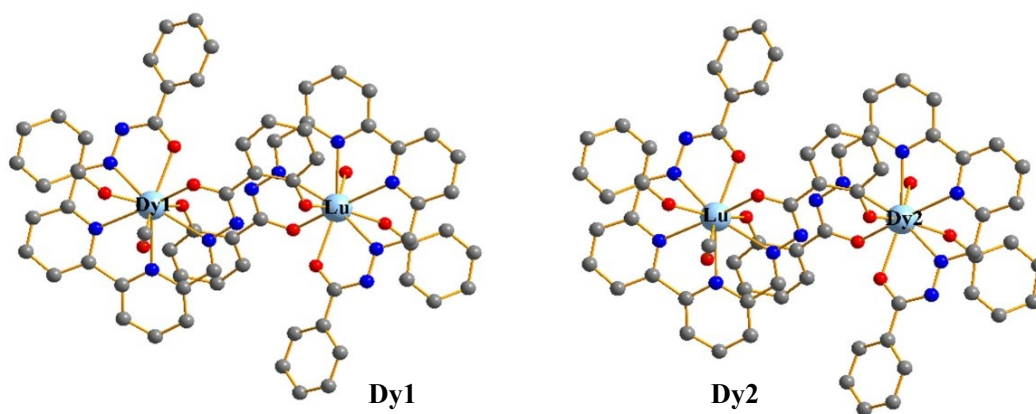

**Fig. S9.** Calculated model structures of individual Dy<sup>III</sup> fragments in complex 1; H atoms are omitted for clarify.

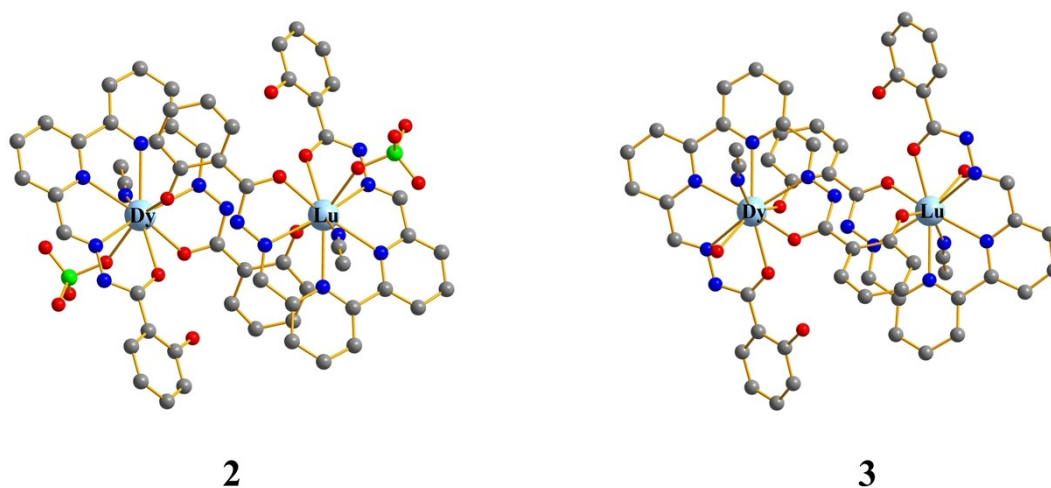

**Fig. S10.** Calculated model structures of individual Dy<sup>III</sup> fragment in complexes 2 and 3; H atoms are omitted for clarify.

**Table S8.** *Ab initio* results of the two individual Dy<sup>III</sup> fragments in complex **1**.

| KDs | Dy1                |                          |                                                                                                                           | Dy2                |                          |                                                                                                    |
|-----|--------------------|--------------------------|---------------------------------------------------------------------------------------------------------------------------|--------------------|--------------------------|----------------------------------------------------------------------------------------------------|
|     | $E/\text{cm}^{-1}$ | $g$                      | $m_J$ wave functions                                                                                                      | $E/\text{cm}^{-1}$ | $g$                      | $m_J$ wave functions                                                                               |
| 1   | 0.0                | 0.009<br>0.011<br>19.822 | 99.3% $ \pm 15/2\rangle$                                                                                                  | 0.0                | 0.013<br>0.015<br>19.811 | 99.1% $ \pm 15/2\rangle$                                                                           |
| 2   | 272.8              | 0.330<br>0.419<br>16.799 | 96.5% $ \pm 13/2\rangle$                                                                                                  | 261.7              | 0.352<br>0.446<br>16.767 | 96.4% $ \pm 13/2\rangle$                                                                           |
| 3   | 468.8              | 1.988<br>3.645<br>11.722 | 75% $ \pm 11/2\rangle$ +9% $ \pm 1/2\rangle$ +6.7% $ \pm 7/2\rangle$                                                      | 447.1              | 1.768<br>2.929<br>12.064 | 78% $ \pm 11/2\rangle$ +8.7% $ \pm 1/2\rangle$ +6.6% $ \pm 7/2\rangle$                             |
| 4   | 558.5              | 8.213<br>6.709<br>2.754  | 35.9% $ \pm 9/2\rangle$ +25.3% $ \pm 3/2\rangle$ +16.3% $ \pm 5/2\rangle$ +8.5% $ \pm 11/2\rangle$ +8% $ \pm 7/2\rangle$  | 534.7              | 8.548<br>6.214<br>3.678  | 42.4% $ \pm 9/2\rangle$ +23.9% $ \pm 3/2\rangle$ +16.4% $ \pm 5/2\rangle$ +8.6% $ \pm 7/2\rangle$  |
| 5   | 637.9              | 0.174<br>2.201<br>12.930 | 40% $ \pm 1/2\rangle$ +22.8% $ \pm 7/2\rangle$ +15.1% $ \pm 9/2\rangle$ +11.3% $ \pm 5/2\rangle$ +5.3% $ \pm 11/2\rangle$ | 605.7              | 0.492<br>2.803<br>13.721 | 40.2% $ \pm 1/2\rangle$ +26.4% $ \pm 7/2\rangle$ +14.1% $ \pm 5/2\rangle$ +11.7% $ \pm 9/2\rangle$ |
| 6   | 698.3              | 0.227<br>3.631<br>14.762 | 38.2% $ \pm 3/2\rangle$ +33.8% $ \pm 5/2\rangle$ +15% $ \pm 1/2\rangle$ +4.8% $ \pm 9/2\rangle$                           | 649.0              | 0.304<br>4.146<br>14.957 | 38.1% $ \pm 3/2\rangle$ +32% $ \pm 5/2\rangle$ +19.5% $ \pm 1/2\rangle$ +4.8% $ \pm 11/2\rangle$   |
| 7   | 724.0              | 1.380<br>3.516<br>13.766 | 27.6% $ \pm 9/2\rangle$ +26.4% $ \pm 7/2\rangle$ +25.1% $ \pm 1/2\rangle$ +13.7% $ \pm 3/2\rangle$                        | 676.4              | 1.124<br>3.763<br>13.240 | 27.8% $ \pm 9/2\rangle$ +25.3% $ \pm 1/2\rangle$ +22.8% $ \pm 7/2\rangle$ +17.4% $ \pm 3/2\rangle$ |
| 8   | 828.3              | 0.240<br>0.375<br>17.973 | 32.3% $ \pm 5/2\rangle$ +32.3% $ \pm 7/2\rangle$ +15.2% $ \pm 3/2\rangle$ +12.3% $ \pm 9/2\rangle$                        | 771.1              | 0.226<br>0.357<br>17.872 | 32.6% $ \pm 5/2\rangle$ +32.2% $ \pm 7/2\rangle$ +14.9% $ \pm 3/2\rangle$ +12.8% $ \pm 9/2\rangle$ |

**Table S9.** *Ab initio* results of the individual Dy<sup>III</sup> fragment in complexes **2** and **3**.

| KDs | <b>2</b>           |                          |                                                                                                                                    | <b>3</b>           |                          |                                                                                                                                    |
|-----|--------------------|--------------------------|------------------------------------------------------------------------------------------------------------------------------------|--------------------|--------------------------|------------------------------------------------------------------------------------------------------------------------------------|
|     | $E/\text{cm}^{-1}$ | $g$                      | $m_J$ wave functions                                                                                                               | $E/\text{cm}^{-1}$ | $g$                      | $m_J$ wave functions                                                                                                               |
| 1   | 0.0                | 0.031<br>0.037<br>19.794 | 99.3% $ \pm 15/2\rangle$                                                                                                           | 0.0                | 0.037<br>0.057<br>19.764 | 99.0% $ \pm 15/2\rangle$                                                                                                           |
| 2   | 179.0              | 0.491<br>0.786<br>16.486 | 83.2% $ \pm 13/2\rangle$ +8.8% $ \pm 11/2\rangle$                                                                                  | 173.9              | 0.708<br>1.332<br>16.048 | 80.1% $ \pm 13/2\rangle$ +7.9% $ \pm 11/2\rangle$ +<br>6% $ \pm 1/2\rangle$                                                        |
| 3   | 256.5              | 2.664<br>5.857<br>10.232 | 33.9% $ \pm 11/2\rangle$ +30.1% $ \pm 9/2\rangle$ +<br>9.1% $ \pm 3/2\rangle$ +7.9% $ \pm 5/2\rangle$ +7.3<br>% $ \pm 1/2\rangle$  | 225.7              | 2.872<br>4.816<br>12.629 | 21% $ \pm 9/2\rangle$ +20% $ \pm 11/2\rangle$ +18.7<br>% $ \pm 7/2\rangle$ +17.8% $ \pm 5/2\rangle$ +10.6%<br>$ \pm 3/2\rangle$    |
| 4   | 285.9              | 0.995<br>3.055<br>11.448 | 41.1% $ \pm 7/2\rangle$ +22.1% $ \pm 5/2\rangle$ +1<br>3.7% $ \pm 9/2\rangle$ +12.9% $ \pm 11/2\rangle$                            | 254.7              | 1.858<br>3.170<br>12.996 | 28.4% $ \pm 7/2\rangle$ +26.2% $ \pm 9/2\rangle$ +2<br>4.4% $ \pm 11/2\rangle$ +13.2% $ \pm 5/2\rangle$                            |
| 5   | 331.6              | 0.500<br>2.480<br>13.106 | 37% $ \pm 3/2\rangle$ +21.3% $ \pm 5/2\rangle$ +14.<br>2% $ \pm 11/2\rangle$ +9.9% $ \pm 1/2\rangle$ +7.8%<br>$ \pm 9/2\rangle$    | 298.5              | 0.241<br>1.417<br>13.511 | 33.3% $ \pm 3/2\rangle$ +20.8% $ \pm 5/2\rangle$ +1<br>6% $ \pm 11/2\rangle$ +11.8% $ \pm 1/2\rangle$ +9.3<br>% $ \pm 13/2\rangle$ |
| 6   | 411.4              | 1.639<br>3.000<br>11.545 | 54.9% $ \pm 1/2\rangle$ +16.4% $ \pm 11/2\rangle$ +<br>10.5% $ \pm 5/2\rangle$ +9.6% $ \pm 7/2\rangle$                             | 364.7              | 0.729<br>1.463<br>16.015 | 39.5% $ \pm 1/2\rangle$ +14.2% $ \pm 5/2\rangle$ +1<br>4% $ \pm 11/2\rangle$ +12.8% $ \pm 7/2\rangle$ +10.<br>2% $ \pm 3/2\rangle$ |
| 7   | 456.0              | 1.447<br>4.936<br>12.321 | 37.1% $ \pm 3/2\rangle$ +20.3% $ \pm 9/2\rangle$ +1<br>6.5% $ \pm 1/2\rangle$ +12.9% $ \pm 5/2\rangle$ +6.8<br>% $ \pm 7/2\rangle$ | 432.1              | 0.516<br>0.843<br>16.120 | 30.9% $ \pm 1/2\rangle$ +28.7% $ \pm 3/2\rangle$ +1<br>6.8% $ \pm 9/2\rangle$ +9.4% $ \pm 11/2\rangle$ +7.7<br>% $ \pm 5/2\rangle$ |
| 8   | 610.7              | 0.063<br>0.141<br>19.206 | 32.2% $ \pm 7/2\rangle$ +24.9% $ \pm 5/2\rangle$ +2<br>2.6% $ \pm 9/2\rangle$ +9.5% $ \pm 3/2\rangle$                              | 602.0              | 0.031<br>0.062<br>19.300 | 29.9% $ \pm 7/2\rangle$ +25.4% $ \pm 5/2\rangle$ +2<br>1.1% $ \pm 9/2\rangle$ +11.8% $ \pm 3/2\rangle$ +8%<br>$ \pm 11/2\rangle$   |

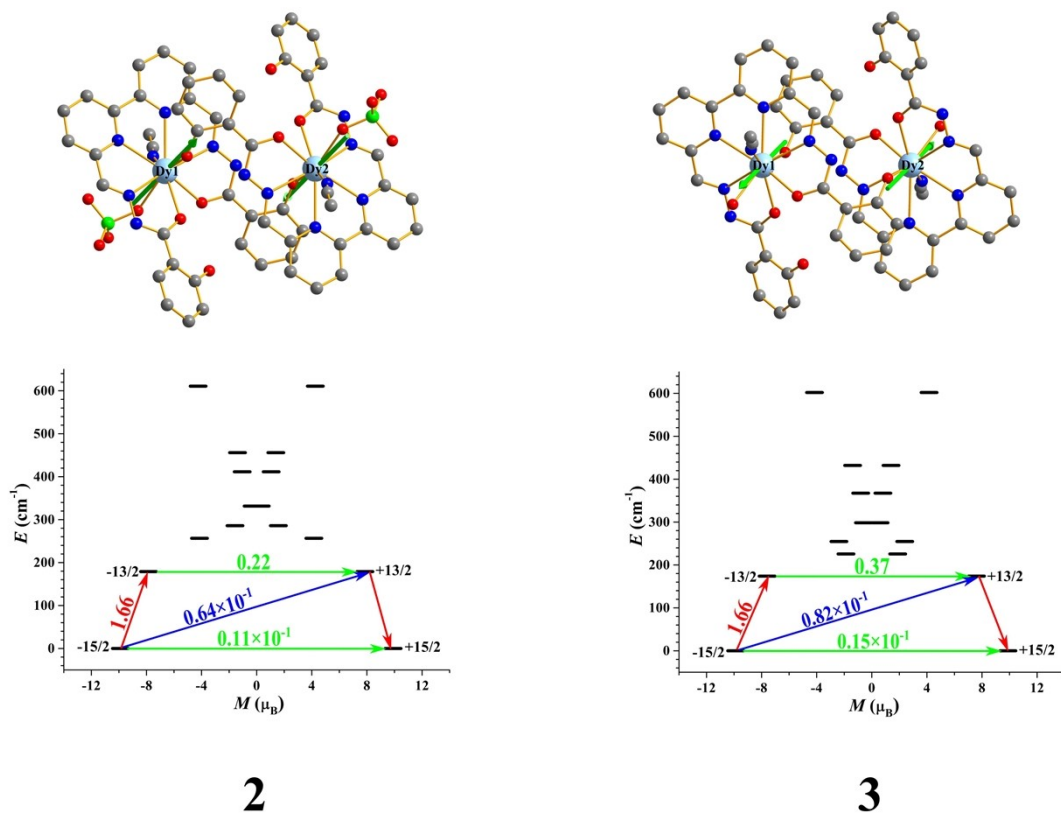

**Fig. S11.** (top) Calculated orientations of the local main magnetic axes on Dy<sup>III</sup> ions of **2** and **3** in the ground KDs. (bottom) Magnetization blocking barriers of individual Dy<sup>III</sup> site of **2** and **3**. The thick black lines represent the KDs as a function of their magnetic moment along the magnetic axis. The green lines correspond to diagonal quantum tunnelling of magnetization; the blue line represents off-diagonal relaxation process. The path shown by the red arrows represents the most probable path for magnetic relaxation. The numbers at each arrow stand for the mean absolute value of the corresponding matrix element of transition magnetic moment.

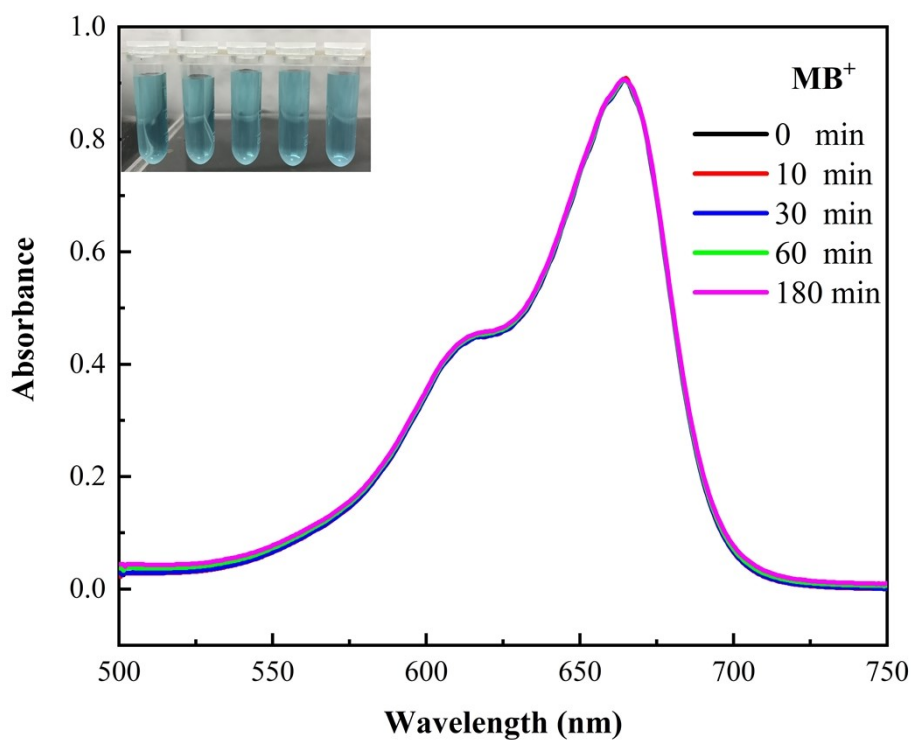

**Fig. S12.** UV/vis spectra for the process of adsorption on MB<sup>+</sup>.

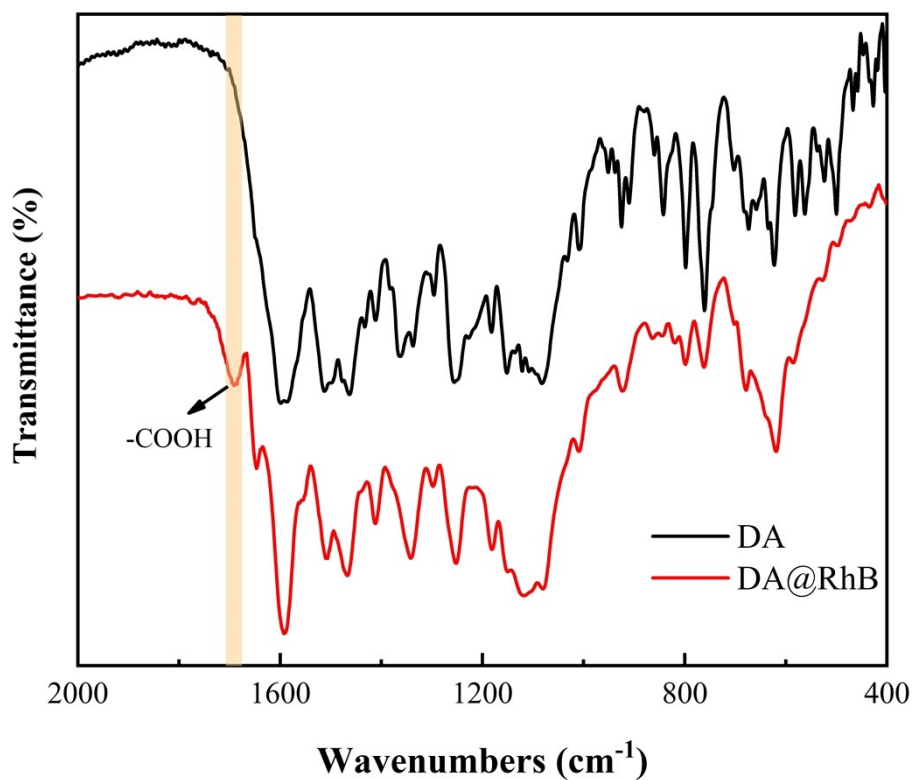

**Fig. S13.** IR spectra of **1** after adsorption for RhB<sup>+</sup>.

**Table S10.** Comparison of the magnetic properties ( $U_{\text{eff}}$ ) for Dy-SMMs with a single Dy-O<sub>phenoxy</sub> bond

| Complex                                                                                                                                                                      | Dy-O <sub>phenoxy</sub> /Å    | $U_{\text{eff}}$ /K | Reference |
|------------------------------------------------------------------------------------------------------------------------------------------------------------------------------|-------------------------------|---------------------|-----------|
| [Dy(L <sup>R</sup> )(H <sub>2</sub> O) <sub>4</sub> (MeCN)](ClO <sub>4</sub> ) <sub>3</sub>                                                                                  | 2.175(3)                      | 320                 | 78        |
| [Dy <sup>III</sup> <sub>2</sub> (L <sup>N6</sup> <sub>R/S</sub> ) <sub>2</sub> (L3) <sub>2</sub> (μ-OH) <sub>2</sub> ](BPh <sub>4</sub> ) <sub>2</sub>                       | 2.153(6), 2.186(6)            | 149.8               | 81        |
| [Dy <sub>2</sub> (H <sub>2</sub> daps) <sub>2</sub> (EtOH) <sub>2</sub> (H <sub>2</sub> O) <sub>2</sub> (MeOH) <sub>2</sub> ](CF <sub>3</sub> SO <sub>3</sub> ) <sub>2</sub> | 2.329(3)                      | 124.7               | 80        |
| <b>2</b>                                                                                                                                                                     | 2.175(8)                      | 106.0               | This work |
| <b>3</b>                                                                                                                                                                     | 2.190(3)                      | 91.9                | This work |
| [Dy(L <sup>R</sup> )(L <sup>A</sup> ) <sub>2</sub> ](ClO <sub>4</sub> ) <sub>3</sub>                                                                                         | 2.172(4)                      | 90                  | 78        |
| [Dy <sub>3</sub> (μ <sub>3</sub> -OH)(HL-1) <sub>3</sub> (H <sub>2</sub> O) <sub>3</sub> ](NO <sub>3</sub> ) <sub>2</sub>                                                    | 2.321(2), 2.287(6), 2.314(7)  | 40.1                | 79        |
| [Dy <sub>3</sub> (H <sub>1</sub> daps) <sub>2</sub> (H <sub>2</sub> daps)(μ <sub>3</sub> -OH)(EtOH)(H <sub>2</sub> O)]                                                       | 2.412(8), 2.204(10), 2.326(8) | 5.3                 | 80        |

**Table S11.** Comparison of maximum adsorption capacity ( $Q_m$ ) on RhB<sup>+</sup> between previous reports and **1**.

| Adsorbent                           | $Q_m$ (mg·g <sup>-1</sup> ) | Dosage (g·L <sup>-1</sup> ) | ref       |
|-------------------------------------|-----------------------------|-----------------------------|-----------|
| MIL-125                             | 59.92                       | 0.5                         | 71        |
| Zn/Co-ZIF-derived carbon            | 119.9                       | 0.04                        | 72        |
| UiO-66                              | 200.4                       | 0.2                         | 73        |
| Magnesium silicate/carbon composite | 244                         | 1                           | 74        |
| H-UiO-66-3.8                        | 487.8                       | 1                           | 75        |
| AC-activated carbon                 | 550.9                       | 0.6                         | 76        |
| <b>1</b>                            | 606                         | 0.125                       | This work |
